# Supplementary material
Source: MDPI journal article supplement (https://www.mdpi.com/2304-6740/6/4/125)

# checkCIF/PLATON report

You have not supplied any structure factors. As a result the full set of tests cannot be run.

THIS REPORT IS FOR GUIDANCE ONLY. IF USED AS PART OF A REVIEW PROCEDURE FOR PUBLICATION, IT SHOULD NOT REPLACE THE EXPERTISE OF AN EXPERIENCED CRYSTALLOGRAPHIC REFEREE.

No syntax errors found.      CIF dictionary      Interpreting this report

## Datablock: compound2

---

Bond precision:    C-C = 0.0329 Å                      Wavelength=1.54184

Cell:                      a=19.0906(14)              b=8.5500(4)              c=17.2528(11)  
                            alpha=90                      beta=100.240(6)              gamma=90  
Temperature:              154 K

|                | Calculated                  | Reported                    |
|----------------|-----------------------------|-----------------------------|
| Volume         | 2771.2(3)                   | 2771.2(3)                   |
| Space group    | P 21/c                      | P 21/c                      |
| Hall group     | : -P 2ybc                   | -P 2ybc                     |
| Moiety formula | C22 H19 Mn Mo N O5 P, C7 H8 | C22 H19 Mn Mo N O5 P, C7 H8 |
| Sum formula    | C29 H27 Mn Mo N O5 P        | C29 H27 Mn Mo N O5 P        |
| Mr             | 651.37                      | 651.37                      |
| Dx,g cm-3      | 1.561                       | 1.561                       |
| Z              | 4                           | 4                           |
| Mu (mm-1)      | 8.285                       | 8.285                       |
| F000           | 1320.0                      | 1360.0                      |
| F000'          | 1321.99                     |                             |
| h,k,lmax       | 23,10,20                    | 22,10,20                    |
| Nref           | 5209                        | 5094                        |
| Tmin,Tmax      | 0.429,0.661                 | 0.491,1.000                 |
| Tmin'          | 0.197                       |                             |

Correction method= # Reported T Limits: Tmin=0.491 Tmax=1.000  
AbsCorr = MULTI-SCAN

Data completeness= 0.978                      Theta(max)= 69.406

R(reflections)= 0.2410( 4275)              wR2(reflections)= 0.5492( 5094)

S = 2.389                      Npar= 305

---

The following ALERTS were generated. Each ALERT has the format

**test-name\_ALERT\_alert-type\_alert-level.**

Click on the hyperlinks for more details of the test.

### Alert level A

|                                                                   |             |
|-------------------------------------------------------------------|-------------|
| PLAT082_ALERT_2_A High R1 Value .....                             | 0.24 Report |
| PLAT084_ALERT_3_A High wR2 Value (i.e. > 0.25) .....              | 0.55 Report |
| PLAT097_ALERT_2_A Large Reported Max. (Positive) Residual Density | 10.95 eA-3  |
| PLAT213_ALERT_2_A Atom C7 has ADP max/min Ratio .....             | 5.1 prolat  |
| PLAT213_ALERT_2_A Atom C10 has ADP max/min Ratio .....            | 6.7 prolat  |

### Alert level B

|                                                                  |              |
|------------------------------------------------------------------|--------------|
| PLAT201_ALERT_2_B Isotropic non-H Atoms in Main Residue(s) ..... | 2 Report     |
| PLAT213_ALERT_2_B Atom O2 has ADP max/min Ratio .....            | 4.4 oblate   |
| PLAT213_ALERT_2_B Atom C6 has ADP max/min Ratio .....            | 5.0 oblate   |
| PLAT213_ALERT_2_B Atom C8 has ADP max/min Ratio .....            | 4.2 oblate   |
| PLAT342_ALERT_3_B Low Bond Precision on C-C Bonds .....          | 0.03294 Ang. |

### Alert level C

DIFMN02\_ALERT\_2\_C The minimum difference density is < -0.1\*ZMAX\*0.75  
 \_refine\_diff\_density\_min given = -3.325  
 Test value = -3.150

DIFMN03\_ALERT\_1\_C The minimum difference density is < -0.1\*ZMAX\*0.75  
 The relevant atom site should be identified.

DIFMX02\_ALERT\_1\_C The maximum difference density is > 0.1\*ZMAX\*0.75  
 The relevant atom site should be identified.

GOODF01\_ALERT\_2\_C The least squares goodness of fit parameter lies  
 outside the range 0.80 <> 2.00  
 Goodness of fit given = 2.389

|                                                                    |                |
|--------------------------------------------------------------------|----------------|
| PLAT068_ALERT_1_C Reported F000 Differs from Calcd (or Missing)... | Please Check   |
| PLAT087_ALERT_2_C Unsatisfactory S value (Too High) .....          | 2.39 Check     |
| PLAT094_ALERT_2_C Ratio of Maximum / Minimum Residual Density .... | 3.29 Report    |
| PLAT098_ALERT_2_C Large Reported Min. (Negative) Residual Density  | -3.33 eA-3     |
| PLAT202_ALERT_3_C Isotropic non-H Atoms in Anion/Solvent .....     | 7 Check        |
| PLAT213_ALERT_2_C Atom O3 has ADP max/min Ratio .....              | 3.3 prolat     |
| PLAT213_ALERT_2_C Atom C5 has ADP max/min Ratio .....              | 3.1 prolat     |
| PLAT234_ALERT_4_C Large Hirshfeld Difference Mo1 --C2 .            | 0.21 Ang.      |
| PLAT234_ALERT_4_C Large Hirshfeld Difference Mn2 --C5 .            | 0.16 Ang.      |
| PLAT234_ALERT_4_C Large Hirshfeld Difference O2 --C2 .             | 0.24 Ang.      |
| PLAT234_ALERT_4_C Large Hirshfeld Difference C17 --C22 .           | 0.19 Ang.      |
| PLAT250_ALERT_2_C Large U3/U1 Ratio for Average U(i,j) Tensor .... | 2.5 Note       |
| PLAT353_ALERT_3_C Long N-H (N0.87,N1.01A) N1 - H4 .                | 1.01 Ang.      |
| PLAT420_ALERT_2_C D-H Without Acceptor N1 --H3 .                   | Please Check   |
| PLAT751_ALERT_4_C Bond Calc 1.56000, Rep 1.5625(14) .....          | Senseless s.u. |
| MO1 -H1 1.555 1.555 .....                                          | # 10 Check     |
| PLAT751_ALERT_4_C Bond Calc 1.82000, Rep 1.824(3) .....            | Senseless s.u. |
| MN2 -H1 1.555 1.555 .....                                          | # 16 Check     |
| PLAT751_ALERT_4_C Bond Calc 0.99000, Rep 0.995(14) .....           | Senseless s.u. |
| N1 -H2 1.555 1.555 .....                                           | # 19 Check     |
| PLAT751_ALERT_4_C Bond Calc 1.00000, Rep 0.997(13) .....           | Senseless s.u. |
| N1 -H3 1.555 1.555 .....                                           | # 20 Check     |
| PLAT752_ALERT_4_C Angle Calc 137.00, Rep 137.2(7) .....            | Senseless s.u. |
| C1 -MO1 -H1 1.555 1.555 1.555                                      | # 37 Check     |
| PLAT752_ALERT_4_C Angle Calc 82.00, Rep 82.4(6) .....              | Senseless s.u. |
| C2 -MO1 -H1 1.555 1.555 1.555                                      | # 38 Check     |
| PLAT752_ALERT_4_C Angle Calc 129.00, Rep 129.0(6) .....            | Senseless s.u. |
| C8 -MO1 -H1 1.555 1.555 1.555                                      | # 39 Check     |
| PLAT752_ALERT_4_C Angle Calc 130.00, Rep 129.9(7) .....            | Senseless s.u. |

|                   |       |      |             |           |       |                |
|-------------------|-------|------|-------------|-----------|-------|----------------|
| C9                | -MO1  | -H1  | 1.555       | 1.555     | 1.555 | # 40 Check     |
| PLAT752_ALERT_4_C | Angle | Calc | 96.00, Rep  | 95.7(6)   | ..... | Senseless s.u. |
| C10               | -MO1  | -H1  | 1.555       | 1.555     | 1.555 | # 41 Check     |
| PLAT752_ALERT_4_C | Angle | Calc | 93.00, Rep  | 93.5(6)   | ..... | Senseless s.u. |
| C7                | -MO1  | -H1  | 1.555       | 1.555     | 1.555 | # 42 Check     |
| PLAT752_ALERT_4_C | Angle | Calc | 76.00, Rep  | 75.8(5)   | ..... | Senseless s.u. |
| C6                | -MO1  | -H1  | 1.555       | 1.555     | 1.555 | # 43 Check     |
| PLAT752_ALERT_4_C | Angle | Calc | 73.00, Rep  | 73.12(12) | ..... | Senseless s.u. |
| P1                | -MO1  | -H1  | 1.555       | 1.555     | 1.555 | # 44 Check     |
| PLAT752_ALERT_4_C | Angle | Calc | 26.00, Rep  | 26.36(6)  | ..... | Senseless s.u. |
| MN2               | -MO1  | -H1  | 1.555       | 1.555     | 1.555 | # 45 Check     |
| PLAT752_ALERT_4_C | Angle | Calc | 172.00, Rep | 171.8(7)  | ..... | Senseless s.u. |
| C3                | -MN2  | -H1  | 1.555       | 1.555     | 1.555 | # 61 Check     |
| PLAT752_ALERT_4_C | Angle | Calc | 89.00, Rep  | 88.9(6)   | ..... | Senseless s.u. |
| C5                | -MN2  | -H1  | 1.555       | 1.555     | 1.555 | # 62 Check     |
| PLAT752_ALERT_4_C | Angle | Calc | 92.00, Rep  | 91.6(9)   | ..... | Senseless s.u. |
| C4                | -MN2  | -H1  | 1.555       | 1.555     | 1.555 | # 63 Check     |
| PLAT752_ALERT_4_C | Angle | Calc | 91.00, Rep  | 91.2(4)   | ..... | Senseless s.u. |
| N1                | -MN2  | -H1  | 1.555       | 1.555     | 1.555 | # 64 Check     |
| PLAT752_ALERT_4_C | Angle | Calc | 74.00, Rep  | 73.88(14) | ..... | Senseless s.u. |
| P1                | -MN2  | -H1  | 1.555       | 1.555     | 1.555 | # 65 Check     |
| PLAT752_ALERT_4_C | Angle | Calc | 22.00, Rep  | 22.36(5)  | ..... | Senseless s.u. |
| MO1               | -MN2  | -H1  | 1.555       | 1.555     | 1.555 | # 66 Check     |
| PLAT752_ALERT_4_C | Angle | Calc | 136.00, Rep | 136.0(12) | ..... | Senseless s.u. |
| MN2               | -N1   | -H2  | 1.555       | 1.555     | 1.555 | # 73 Check     |
| PLAT752_ALERT_4_C | Angle | Calc | 113.00, Rep | 113.0(10) | ..... | Senseless s.u. |
| MN2               | -N1   | -H3  | 1.555       | 1.555     | 1.555 | # 74 Check     |
| PLAT752_ALERT_4_C | Angle | Calc | 97.00, Rep  | 97.5(12)  | ..... | Senseless s.u. |
| H2                | -N1   | -H3  | 1.555       | 1.555     | 1.555 | # 75 Check     |
| PLAT752_ALERT_4_C | Angle | Calc | 106.00, Rep | 106(3)    | ..... | Senseless s.u. |
| H2                | -N1   | -H4  | 1.555       | 1.555     | 1.555 | # 77 Check     |
| PLAT752_ALERT_4_C | Angle | Calc | 106.00, Rep | 106(3)    | ..... | Senseless s.u. |
| H3                | -N1   | -H4  | 1.555       | 1.555     | 1.555 | # 78 Check     |

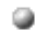

## Alert level G

|                   |                                                  |                          |
|-------------------|--------------------------------------------------|--------------------------|
| PLAT002_ALERT_2_G | Number of Distance or Angle Restraints on AtSite | 6 Note                   |
| PLAT003_ALERT_2_G | Number of Uiso or Uij Restrained non-H Atoms ... | 6 Report                 |
| PLAT007_ALERT_5_G | Number of Unrefined Donor-H Atoms .....          | 2 Report                 |
| PLAT072_ALERT_2_G | SHELXL First Parameter in WGHT Unusually Large   | 0.20 Report              |
| PLAT172_ALERT_4_G | The CIF-Embedded .res File Contains DFIX Records | 3 Report                 |
| PLAT177_ALERT_4_G | The CIF-Embedded .res File Contains DELU Records | 2 Report                 |
| PLAT178_ALERT_4_G | The CIF-Embedded .res File Contains SIMU Records | 2 Report                 |
| PLAT300_ALERT_4_G | Atom Site Occupancy of C30                       | Constrained at 0.7 Check |
| PLAT300_ALERT_4_G | Atom Site Occupancy of C31                       | Constrained at 0.7 Check |
| PLAT300_ALERT_4_G | Atom Site Occupancy of C32                       | Constrained at 0.7 Check |
| PLAT300_ALERT_4_G | Atom Site Occupancy of C33                       | Constrained at 0.7 Check |
| PLAT300_ALERT_4_G | Atom Site Occupancy of C34                       | Constrained at 0.7 Check |
| PLAT300_ALERT_4_G | Atom Site Occupancy of C35                       | Constrained at 0.7 Check |
| PLAT300_ALERT_4_G | Atom Site Occupancy of C36                       | Constrained at 0.7 Check |
| PLAT300_ALERT_4_G | Atom Site Occupancy of H30A                      | Constrained at 0.7 Check |
| PLAT300_ALERT_4_G | Atom Site Occupancy of H30B                      | Constrained at 0.7 Check |
| PLAT300_ALERT_4_G | Atom Site Occupancy of H30C                      | Constrained at 0.7 Check |
| PLAT300_ALERT_4_G | Atom Site Occupancy of H32                       | Constrained at 0.7 Check |
| PLAT300_ALERT_4_G | Atom Site Occupancy of H33                       | Constrained at 0.7 Check |
| PLAT300_ALERT_4_G | Atom Site Occupancy of H34                       | Constrained at 0.7 Check |
| PLAT300_ALERT_4_G | Atom Site Occupancy of H35                       | Constrained at 0.7 Check |
| PLAT300_ALERT_4_G | Atom Site Occupancy of H36                       | Constrained at 0.7 Check |
| PLAT300_ALERT_4_G | Atom Site Occupancy of C30B                      | Constrained at 0.3 Check |
| PLAT300_ALERT_4_G | Atom Site Occupancy of C31B                      | Constrained at 0.3 Check |
| PLAT300_ALERT_4_G | Atom Site Occupancy of C32B                      | Constrained at 0.3 Check |

|                   |                                                  |                |       |       |
|-------------------|--------------------------------------------------|----------------|-------|-------|
| PLAT300_ALERT_4_G | Atom Site Occupancy of C33B                      | Constrained at | 0.3   | Check |
| PLAT300_ALERT_4_G | Atom Site Occupancy of C34B                      | Constrained at | 0.3   | Check |
| PLAT300_ALERT_4_G | Atom Site Occupancy of C35B                      | Constrained at | 0.3   | Check |
| PLAT300_ALERT_4_G | Atom Site Occupancy of C36B                      | Constrained at | 0.3   | Check |
| PLAT300_ALERT_4_G | Atom Site Occupancy of H30D                      | Constrained at | 0.3   | Check |
| PLAT300_ALERT_4_G | Atom Site Occupancy of H30E                      | Constrained at | 0.3   | Check |
| PLAT300_ALERT_4_G | Atom Site Occupancy of H30F                      | Constrained at | 0.3   | Check |
| PLAT300_ALERT_4_G | Atom Site Occupancy of H32B                      | Constrained at | 0.3   | Check |
| PLAT300_ALERT_4_G | Atom Site Occupancy of H33B                      | Constrained at | 0.3   | Check |
| PLAT300_ALERT_4_G | Atom Site Occupancy of H34B                      | Constrained at | 0.3   | Check |
| PLAT300_ALERT_4_G | Atom Site Occupancy of H35B                      | Constrained at | 0.3   | Check |
| PLAT300_ALERT_4_G | Atom Site Occupancy of H36B                      | Constrained at | 0.3   | Check |
| PLAT302_ALERT_4_G | Anion/Solvent/Minor-Residue Disorder (Resd 2 )   |                | 100%  | Note  |
| PLAT302_ALERT_4_G | Anion/Solvent/Minor-Residue Disorder (Resd 3 )   |                | 100%  | Note  |
| PLAT303_ALERT_2_G | Full Occupancy Atom H1 with # Connections        |                | 2.00  | Check |
| PLAT304_ALERT_4_G | Non-Integer Number of Atoms in ..... Resd 2      |                | 10.50 | Check |
| PLAT304_ALERT_4_G | Non-Integer Number of Atoms in ..... Resd 3      |                | 4.50  | Check |
| PLAT380_ALERT_4_G | Incorrectly? Oriented X(sp2)-Methyl Moiety ..... |                | C30   | Check |
| PLAT794_ALERT_5_G | Tentative Bond Valency for Mn2 (I) .             |                | 0.92  | Info  |
| PLAT802_ALERT_4_G | CIF Input Record(s) with more than 80 Characters |                | 1     | Info  |
| PLAT860_ALERT_3_G | Number of Least-Squares Restraints .....         |                | 24    | Note  |

---

5 **ALERT level A** = Most likely a serious problem - resolve or explain  
 5 **ALERT level B** = A potentially serious problem, consider carefully  
 42 **ALERT level C** = Check. Ensure it is not caused by an omission or oversight  
 46 **ALERT level G** = General information/check it is not something unexpected

3 ALERT type 1 CIF construction/syntax error, inconsistent or missing data  
 21 ALERT type 2 Indicator that the structure model may be wrong or deficient  
 5 ALERT type 3 Indicator that the structure quality may be low  
 67 ALERT type 4 Improvement, methodology, query or suggestion  
 2 ALERT type 5 Informative message, check

---

## Datablock: compound3a

---

Bond precision: C-C = 0.0042 A                      Wavelength=1.54184

Cell:                      a=10.9412(6)                      b=11.1757(6)                      c=11.9618(6)  
                                  alpha=84.979(4)                      beta=78.905(5)                      gamma=84.550(4)

Temperature: 156 K

|                | Calculated           | Reported             |
|----------------|----------------------|----------------------|
| Volume         | 1425.22(13)          | 1425.22(13)          |
| Space group    | P -1                 | P -1                 |
| Hall group     | : -P 1               | -P 1                 |
| Moiety formula | C31 H25 Mn Mo N O5 P | C31 H25 Mn Mo N O5 P |
| Sum formula    | C31 H25 Mn Mo N O5 P | C31 H25 Mn Mo N O5 P |
| Mr             | 673.37               | 673.37               |
| Dx,g cm-3      | 1.569                | 1.569                |
| Z              | 2                    | 2                    |
| Mu (mm-1)      | 8.080                | 8.080                |
| F000           | 680.0                | 680.0                |
| F000'          | 681.06               |                      |
| h,k,lmax       | 13,13,14             | 13,13,14             |
| Nref           | 5376                 | 5243                 |
| Tmin,Tmax      | 0.296,0.524          | 0.739,1.000          |
| Tmin'          | 0.136                |                      |

Correction method= # Reported T Limits: Tmin=0.739 Tmax=1.000  
AbsCorr = MULTI-SCAN

Data completeness= 0.975                      Theta(max)= 69.691

R(reflections)= 0.0276( 4743)              wR2(reflections)= 0.0752( 5243)

S = 1.058                                      Npar= 367

---

The following ALERTS were generated. Each ALERT has the format  
**test-name\_ALERT\_alert-type\_alert-level.**  
Click on the hyperlinks for more details of the test.

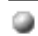

#### Alert level G

|                   |                                |     |                    |   |            |
|-------------------|--------------------------------|-----|--------------------|---|------------|
| PLAT230_ALERT_2_G | Hirshfeld Test Diff for        | O1  | --C1               | . | 7.3 s.u.   |
| PLAT230_ALERT_2_G | Hirshfeld Test Diff for        | O2  | --C2               | . | 7.4 s.u.   |
| PLAT230_ALERT_2_G | Hirshfeld Test Diff for        | O3  | --C3               | . | 5.2 s.u.   |
| PLAT230_ALERT_2_G | Hirshfeld Test Diff for        | O4  | --C4               | . | 5.4 s.u.   |
| PLAT232_ALERT_2_G | Hirshfeld Test Diff (M-X)      | Mo1 | --C1               | . | 10.9 s.u.  |
| PLAT232_ALERT_2_G | Hirshfeld Test Diff (M-X)      | Mo1 | --C2               | . | 9.7 s.u.   |
| PLAT232_ALERT_2_G | Hirshfeld Test Diff (M-X)      | Mn1 | --C3               | . | 9.2 s.u.   |
| PLAT232_ALERT_2_G | Hirshfeld Test Diff (M-X)      | Mn1 | --C4               | . | 9.5 s.u.   |
| PLAT232_ALERT_2_G | Hirshfeld Test Diff (M-X)      | Mn1 | --C5               | . | 7.8 s.u.   |
| PLAT232_ALERT_2_G | Hirshfeld Test Diff (M-X)      | Mn1 | --C6               | . | 7.6 s.u.   |
| PLAT303_ALERT_2_G | Full Occupancy Atom H1         |     | with # Connections |   | 2.00 Check |
| PLAT794_ALERT_5_G | Tentative Bond Valency for Mn1 |     | (I)                | . | 0.96 Info  |

---

0 **ALERT level A** = Most likely a serious problem - resolve or explain  
0 **ALERT level B** = A potentially serious problem, consider carefully  
0 **ALERT level C** = Check. Ensure it is not caused by an omission or oversight  
12 **ALERT level G** = General information/check it is not something unexpected

0 ALERT type 1 CIF construction/syntax error, inconsistent or missing data

11 ALERT type 2 Indicator that the structure model may be wrong or deficient  
0 ALERT type 3 Indicator that the structure quality may be low  
0 ALERT type 4 Improvement, methodology, query or suggestion  
1 ALERT type 5 Informative message, check

---

It is advisable to attempt to resolve as many as possible of the alerts in all categories. Often the minor alerts point to easily fixed oversights, errors and omissions in your CIF or refinement strategy, so attention to these fine details can be worthwhile. In order to resolve some of the more serious problems it may be necessary to carry out additional measurements or structure refinements. However, the purpose of your study may justify the reported deviations and the more serious of these should normally be commented upon in the discussion or experimental section of a paper or in the "special\_details" fields of the CIF. checkCIF was carefully designed to identify outliers and unusual parameters, but every test has its limitations and alerts that are not important in a particular case may appear. Conversely, the absence of alerts does not guarantee there are no aspects of the results needing attention. It is up to the individual to critically assess their own results and, if necessary, seek expert advice.

### **Publication of your CIF in IUCr journals**

A basic structural check has been run on your CIF. These basic checks will be run on all CIFs submitted for publication in IUCr journals (*Acta Crystallographica*, *Journal of Applied Crystallography*, *Journal of Synchrotron Radiation*); however, if you intend to submit to *Acta Crystallographica Section C* or *E* or *IUCrData*, you should make sure that full publication checks are run on the final version of your CIF prior to submission.

### **Publication of your CIF in other journals**

Please refer to the *Notes for Authors* of the relevant journal for any special instructions relating to CIF submission.

---

**PLATON version of 26/09/2018; check.def file version of 13/09/2018**

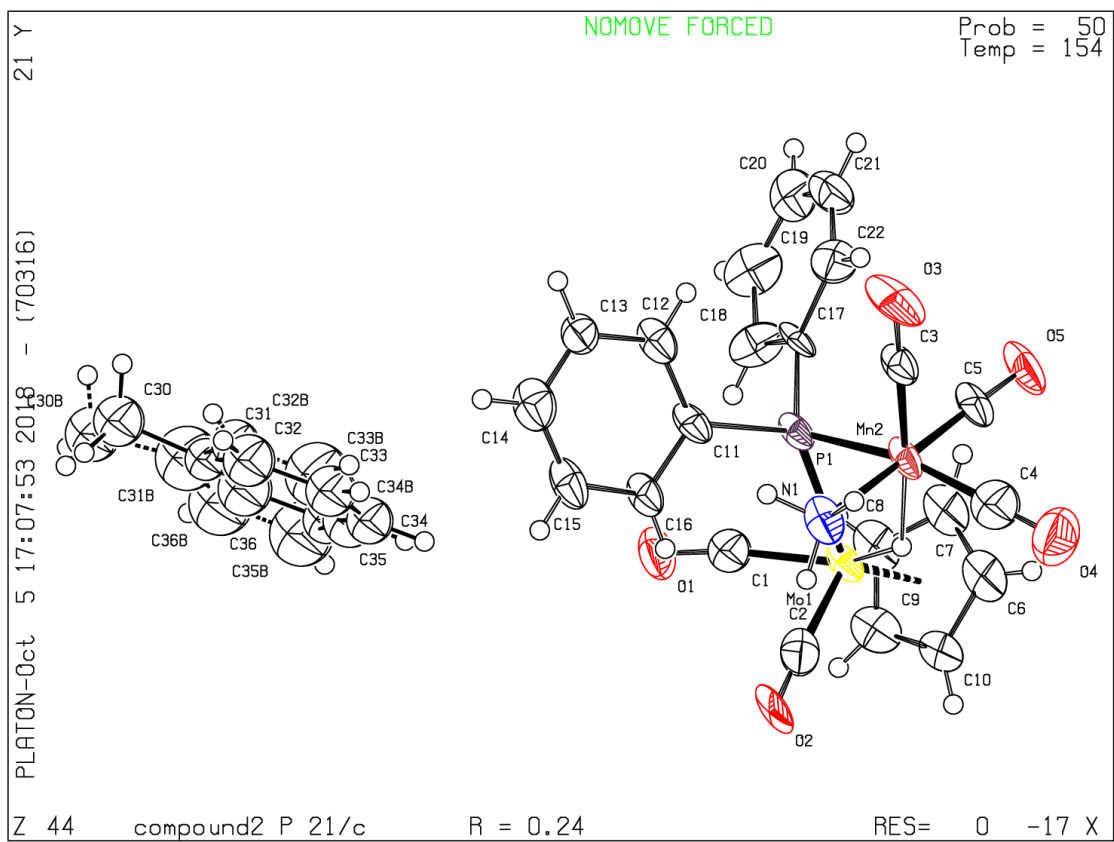

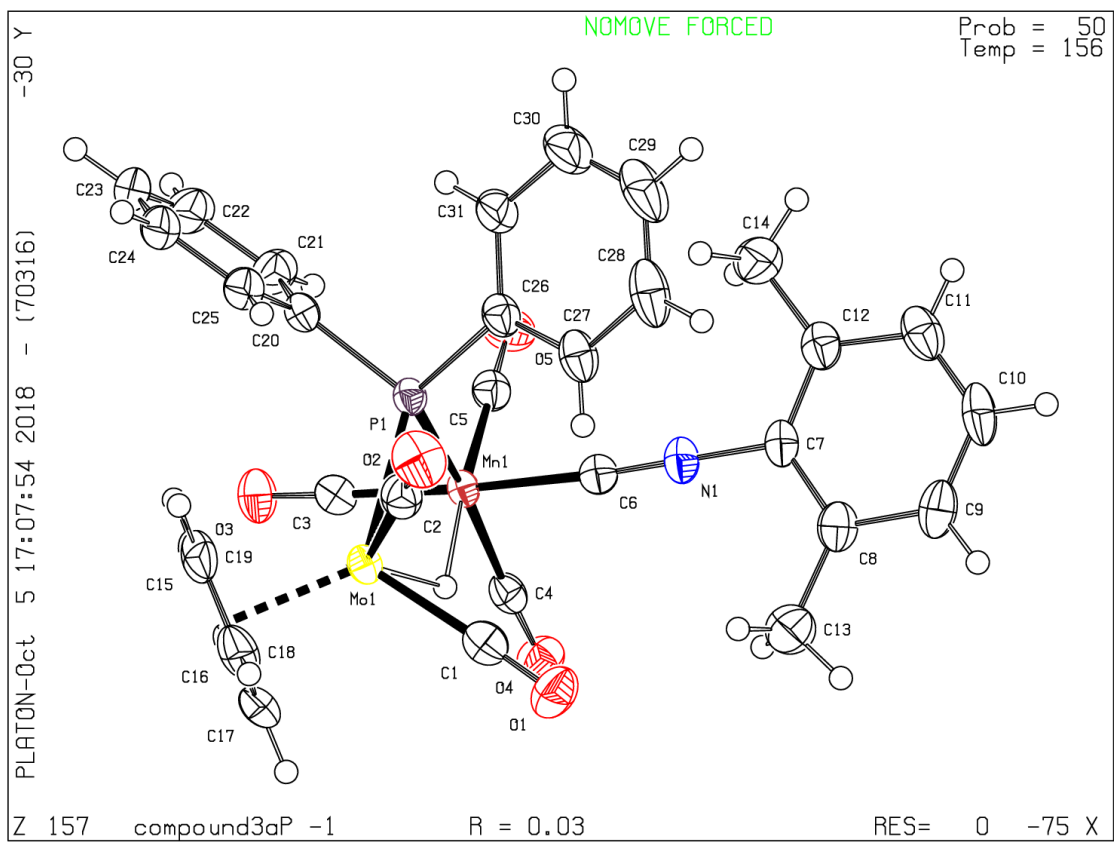

Supplement: s1 [file s1]
