# Supplementary material
Source: MDPI journal article supplement (https://www.mdpi.com/2304-6740/6/4/125)
Supplement: s1 [file s1]

# Supplementary Material

## Trapping of an Heterometallic Unsaturated Hydride: Structure and Properties of the Ammonia Complex [MoMnCp( $\mu$ -H)( $\mu$ -PPh<sub>2</sub>)(CO)<sub>5</sub>(NH<sub>3</sub>)]

M. Angeles Alvarez, Daniel García-Vivó\*, Estefanía Huergo, and Miguel A. Ruiz\*

*Departamento de Química Orgánica e Inorgánica/IUQOEM, Universidad de Oviedo, E-33071 Oviedo, Spain.*

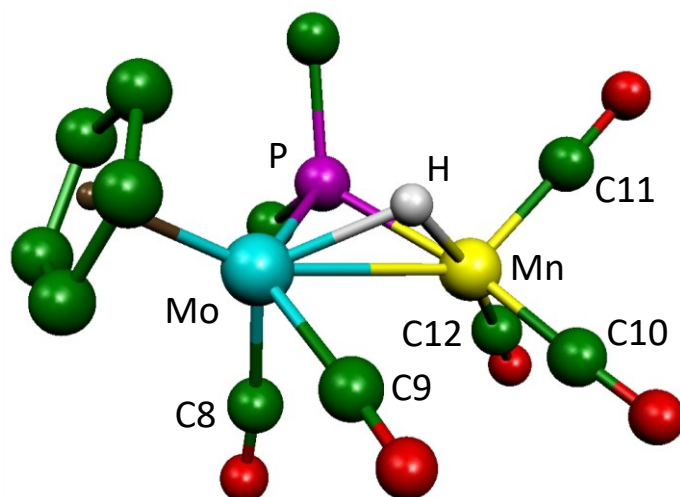

**Figure S1.** DFT-optimized structure of compound **H**, with most H atoms and Cy rings (except their C<sup>1</sup> atoms) omitted.

**Table S1:** DFT-Optimized Geometry for **H** (distances in Å, angles in deg.)

| Parameter | B3LYP | B3LYP-D | Parameter  | B3LYP  | B3LYP-D |
|-----------|-------|---------|------------|--------|---------|
| Mo–Mn     | 2.796 | 2.788   | Mo–P–Mn    | 71.6   | 72.6    |
| Mo–P      | 2.488 | 2.452   | Mo–H–Mn    | 99.4   | 99.0    |
| Mn–P      | 2.280 | 2.252   | C9–Mo–C8   | 83.0   | 83.8    |
| Mo–H      | 1.860 | 1.866   | C9–Mo–P    | 130.1  | 131.0   |
| Mn–H      | 1.806 | 1.800   | C8–Mo–P    | 83.7   | 83.5    |
| Mo–C8     | 1.985 | 1.983   | C9–Mo–H    | 72.2   | 72.3    |
| Mo–C9     | 2.022 | 2.024   | C8–Mo–H    | 114.9  | 115.1   |
| Mn–C10    | 1.818 | 1.817   | C10–Mn–C11 | 93.1   | 94.4    |
| Mn–C11    | 1.786 | 1.785   | C10–Mn–C12 | 93.8   | 95.5    |
| Mn–C12    | 1.800 | 1.800   | C11–Mn–C12 | 91.5   | 92.3    |
|           |       |         | C10–Mn–P   | 164.4  | 162.8   |
|           |       |         | C11–Mn–P   | 98.0   | 98.1    |
|           |       |         | C12–Mn–P   | 96.7   | 95.6    |
|           |       |         | C10–Mn–H   | 91.1   | 90.3    |
|           |       |         | C11–Mn–H   | 96.5   | 94.7    |
|           |       |         | C12–Mn–H   | 170.29 | 170.5   |
|           |       |         | P–Mo–Mn–H  | 108.5  | 109.4   |

**Table S2.** Selected molecular orbitals for compound **H** (B3LYP)

| OM                                        |                                                                                     |                                                                                      |                     |
|-------------------------------------------|-------------------------------------------------------------------------------------|--------------------------------------------------------------------------------------|---------------------|
| Energy (eV)                               | <i>view 1</i> ...                                                                   | ...                                                                                  | ..... <i>view 2</i> |
| Assignment                                |                                                                                     |                                                                                      |                     |
| LUMO 117                                  | 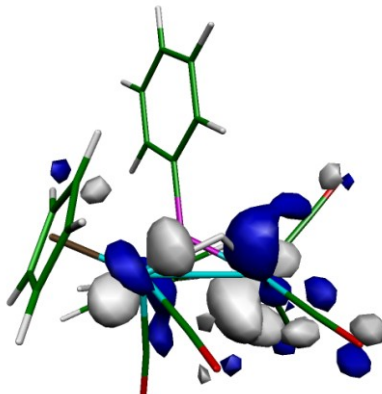  |                                                                                      |                     |
| -2.25                                     |                                                                                     |                                                                                      |                     |
| $\pi^*(\text{Mo-Mn})$                     |                                                                                     |                                                                                      |                     |
| HOMO 116                                  |   |   |                     |
| -5.80                                     |                                                                                     |                                                                                      |                     |
| $\sigma_{\text{M-P}} + \pi_{\text{M-M}}$  |                                                                                     |                                                                                      |                     |
| MO 115                                    |  |  |                     |
| -6.07                                     |                                                                                     |                                                                                      |                     |
| $\text{LP}(\text{M}) + \pi_{\text{M-CO}}$ |                                                                                     |                                                                                      |                     |

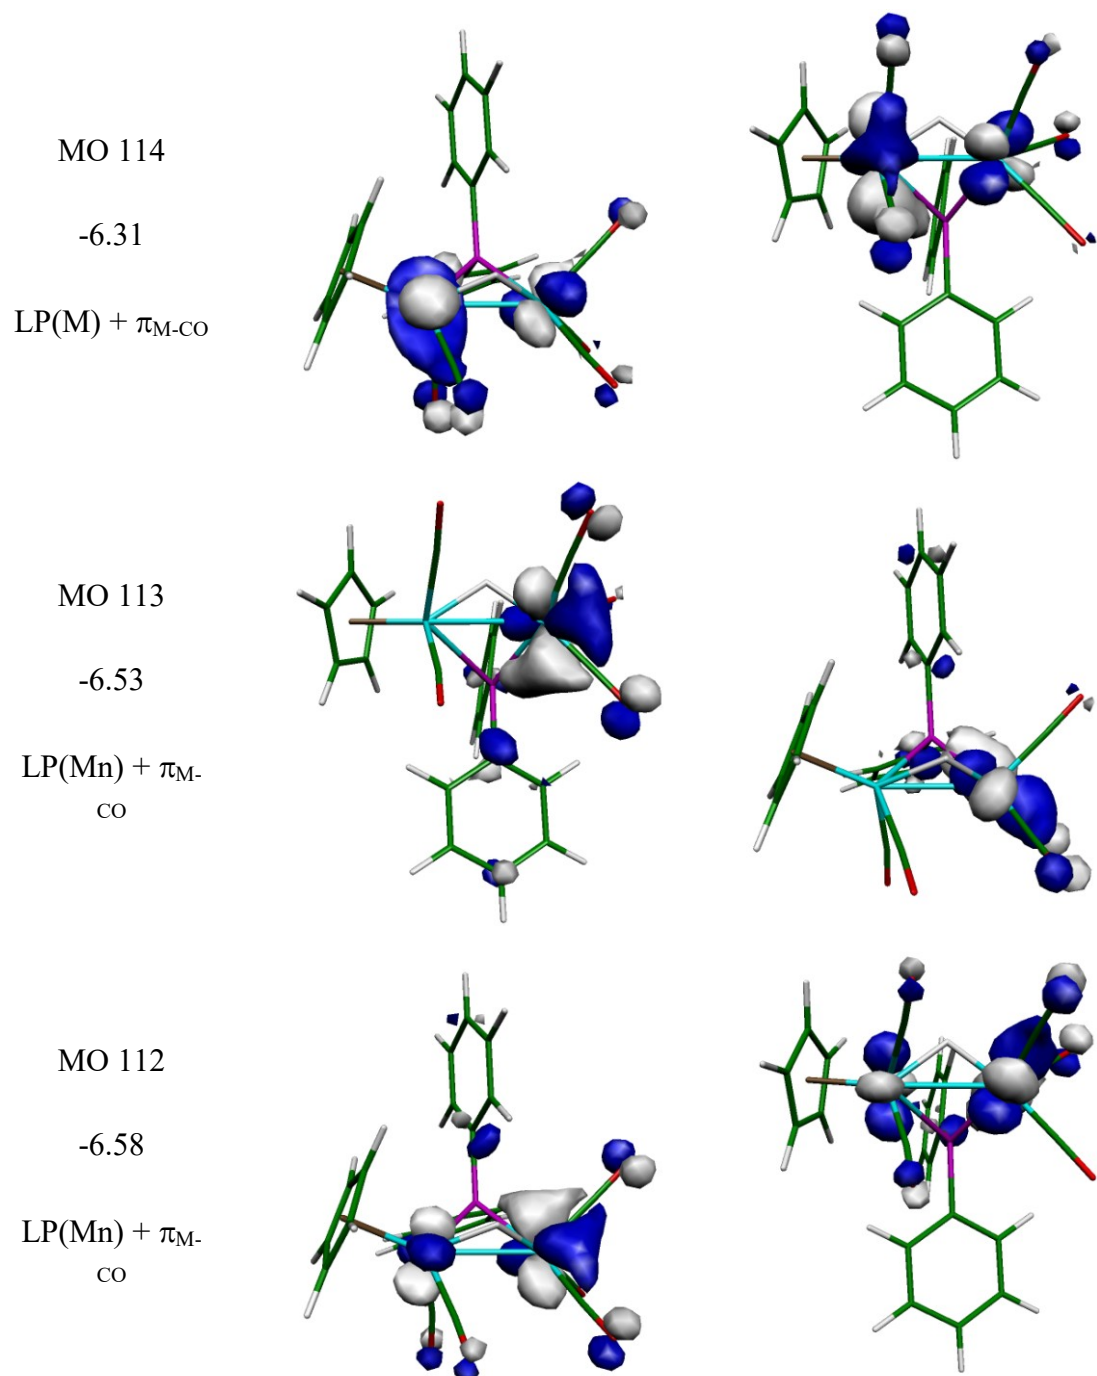

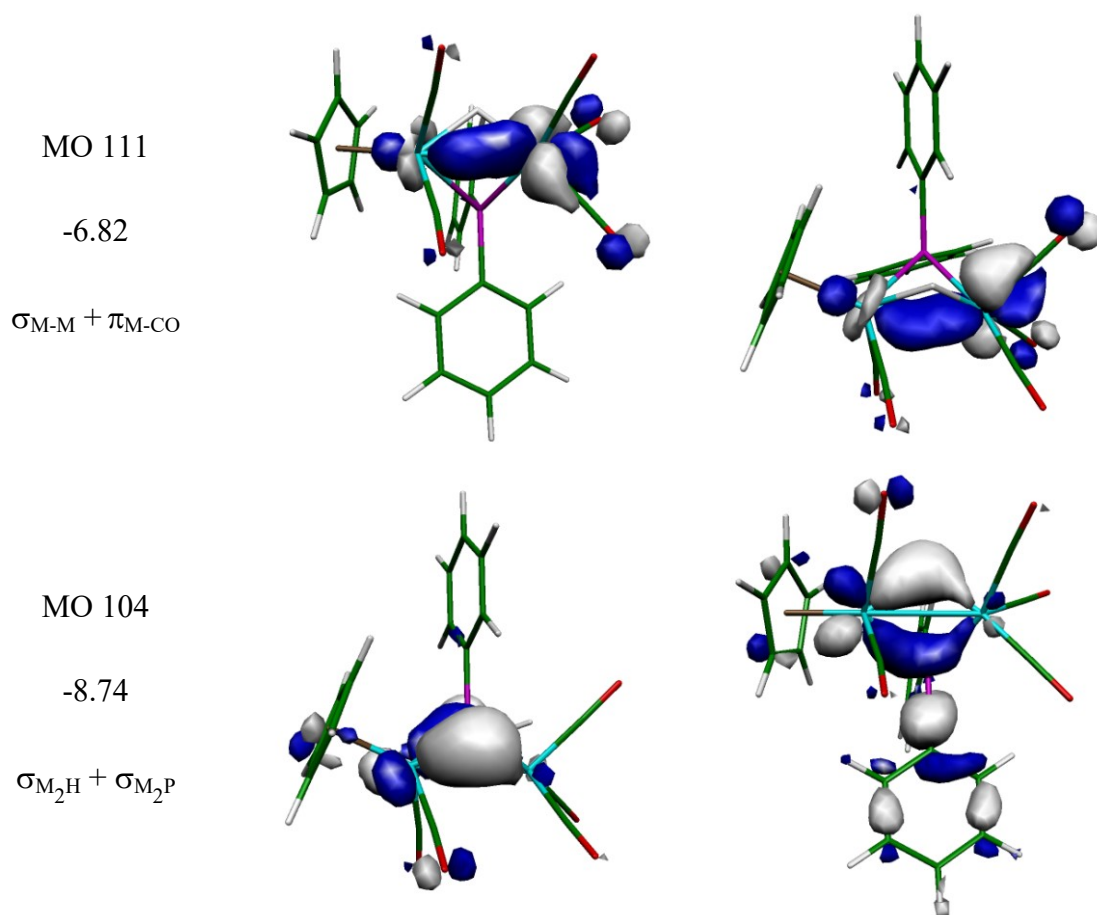

**Table S3:** Electron density ( $\rho$ , eÅ<sup>-3</sup>) and Mayer Bond Indexes (MBI) at Mo–Mn bonds (B3LYP).

|          | [MoMnCp( $\mu$ -PPh <sub>2</sub> )(CO) <sub>6</sub> ] <sup>−</sup> | <b>H</b> | <b>H (B3LYP-D)</b> | <b>1</b> |
|----------|--------------------------------------------------------------------|----------|--------------------|----------|
| $\rho^*$ | 0.204                                                              | 0.284    | 0.287              | 0.319    |
| MBI      | 0.369                                                              | 0.429    | 0.432              | 0.556    |

\*Value computed at the corresponding bond critical point or minimum value at the intermetallic axis

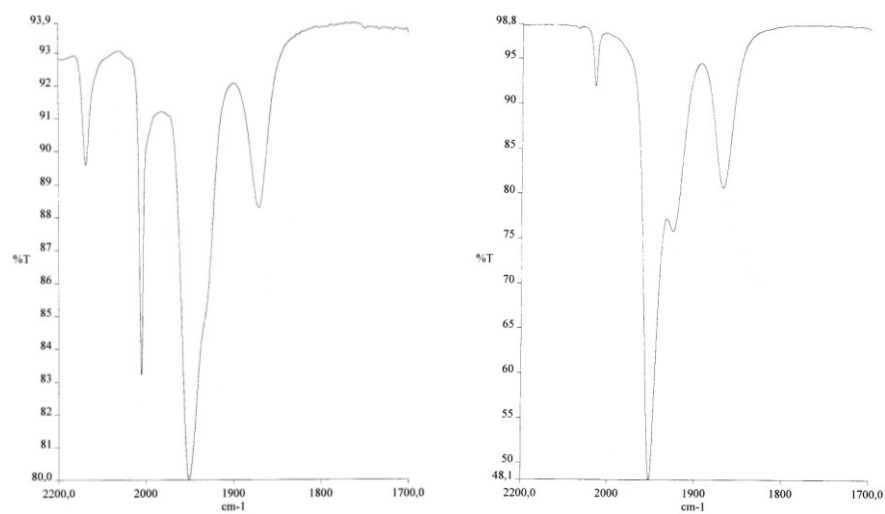

**Figure S2.** IR spectra of compounds **3a** (left) and **4** (right), recorded in dichloromethane solution.

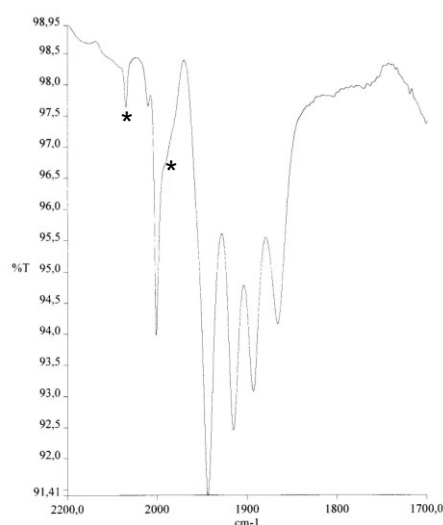

**Figure S3.** IR spectrum of compound **2** recorded in tetrahydrofuran solution. Peaks marked \* correspond to the complex  $[\text{MoMnCp}(\mu\text{-H})(\mu\text{-PPh}_2)(\text{CO})_6]$ .

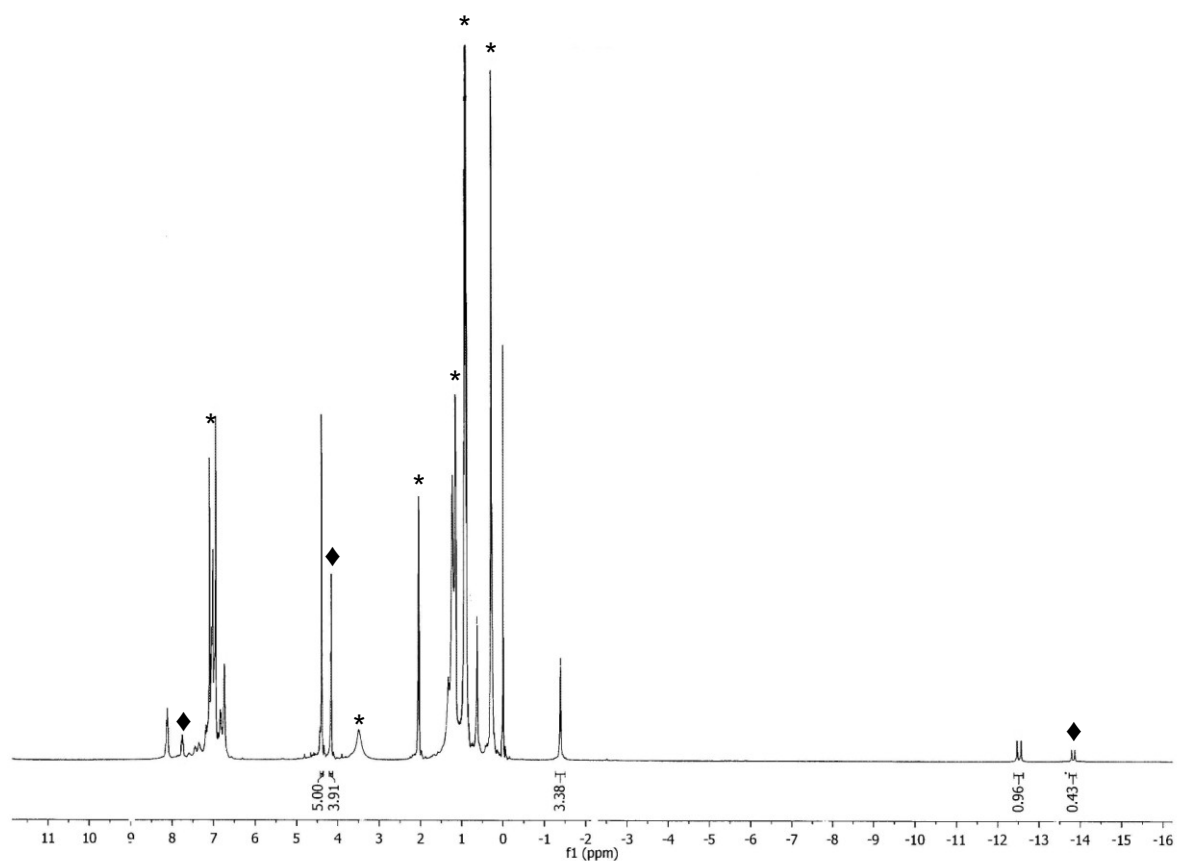

**Figure S4.**  $^1\text{H}$  NMR spectrum (400.13 MHz) of crude compound **2**, recorded in toluene- $\text{d}_8$  solution at 213 K. Peaks marked \* correspond to residual solvents (toluene, tetrahydrofuran, petroleum ether) and grease, and peaks marked  $\blacklozenge$  correspond to the complex  $[\text{MoMnCp}(\mu\text{-H})(\mu\text{-PPh}_2)(\text{CO})_6]$ , formed upon decomposition of **2** during preparation of the sample.
